# Supplementary material for: Predictive Value of HAS-BLED and HEMORR2HAGES Bleeding Risk Scores After Percutaneous Coronary Intervention
Source: PubMed Central journal article supplement — Tex Heart Inst J. 2024 Jul 10;51(2):e238267. doi: 10.14503/THIJ-23-8267 (PMC11233982; doi:10.14503/thij-23-8267), 2024-07-10
Supplement: 10.14503_thij-23-8267.s1.pdf [file 10.14503_thij-23-8267.s1.pdf]

Supplementary Materials

# **Predictive Value of HAS-BLED and HEMORR2HAGES Bleeding Risk Scores After Percutaneous Coronary Intervention**

Ianis Doomun, MMed; Daphné Doomun, MMed; Sara Schukraft, MD; Diego Arroyo, MD; Selma T. Cook, BMed; Tibor Huwylar, MD; Jean-Jacques Goy, MD; Jean-Christophe Stauffer, MD; Mario Togni, MD; Serban Puricel, MD; Stéphane Cook, MD

Department of Cardiology, University and Hospital Fribourg, Fribourg, Switzerland

**Citation:** *Tex Heart Inst J.* 2024;51(2):e238267. doi 10.14503/THIJ-23-8267

**Corresponding author:**

Stéphane Cook, MD, Department of Cardiology, University & Hospital Fribourg, CH-1708 Fribourg (stephane.cook@h-fr.ch)

**Supplemental Table I:** Incidence of criteria included in the HAS-BLED score.

| HAS-BLED                                                                            | Patients<br>N (%) | No<br>bleeding<br>N=891 | Any<br>bleeding<br>N=189 | <i>P</i><br><i>value</i> | No major<br>bleeding<br>N=1032 | Bleeding<br>BARC 3-5<br>N=48 | <i>P</i><br><i>value</i> |
|-------------------------------------------------------------------------------------|-------------------|-------------------------|--------------------------|--------------------------|--------------------------------|------------------------------|--------------------------|
| Hypertension<br>>160mmHg                                                            | 284<br>(26.3%)    | 229<br>(25.7%)          | 55<br>(29.1%)            | 0.34                     | 266<br>(25.8%)                 | 18<br>(37.5%)                | 0.07                     |
| Renal failure<br>(Cr>221 µmol/L or<br>chronic dialysis or<br>transplantation)       | 18<br>(1.7%)      | 11 (1.2%)               | 7 (3.7%)                 | 0.02                     | 17 (1.6%)                      | 1 (2.1%)                     | 0.82                     |
| Liver disease<br>(cirrhosis or<br>bilirubin>2x normal<br>or ASAT/ALAT>3x<br>normal) | 48<br>(4.4%)      | 38 (4.3%)               | 10 (5.3%)                | 0.53                     | 45 (4.4%)                      | 3 (6.3%)                     | 0.55                     |
| Stroke history                                                                      | 54 (5%)           | 45 (5.1%)               | 9 (4.8%)                 | 0.87                     | 52 (5.0%)                      | 2 (4.2%)                     | 0.79                     |
| Prior major bleeding<br>or predisposition to<br>bleeding (anemia)                   | 205<br>(19%)      | 150<br>(16.8%)          | 55<br>(29.1%)            | <0.01                    | 180<br>(17.4%)                 | 25 (52%)                     | <0.01                    |
| Labile INR:<br>unstable/high, time<br>in therapeutic range<br><60%                  | 8 (0.7%)          | 8 (0.9%)                | 0 (0%)                   | 0.54                     | 8 (0.8%)                       | 0 (0%)                       | 0.54                     |
| Age >65 yr                                                                          | 609<br>(56.4%)    | 476<br>(53.4%)          | 133<br>(70.4%)           | <0.01                    | 569<br>(55.1%)                 | 40 (83%)                     | <0.01                    |
| Medication: NSAID,<br>antiplatelet, ASA                                             | 1080<br>(100%)    | 891<br>(100%)           | 189<br>(100%)            | <i>n/a</i>               | 1032<br>(100%)                 | 48 (100%)                    | <i>n/a</i>               |
| Alcohol (>8<br>drinks/week)                                                         | 104<br>(9.6%)     | 79 (8.8%)               | 25<br>(13.2%)            | 0.07                     | 95 (9.2%)                      | 9 (18.8%)                    | 0.03                     |

P value of <0.05 was considered statistically significant.

Abbreviations: ASA = aspirin; ASAT = aspartate aminotransferase; ALAT = alanine aminotransferase; Cr = creatinine; INR = International Normalized Ratio; NSAID = nonsteroidal anti-inflammatory drug

**Supplemental Table II:** Incidence of criteria included in the HEMORR2HAGES score.

| HEMORR2HAGES                                                                                                  | Patients<br>N (%) | No<br>bleeding<br>N=891 | Any<br>bleeding<br>N=189 | <i>P</i><br><i>value</i> | No major<br>bleeding<br>N=1032 | Bleeding<br>BARC 3-<br>5 N=48 | <i>P</i><br><i>value</i> |
|---------------------------------------------------------------------------------------------------------------|-------------------|-------------------------|--------------------------|--------------------------|--------------------------------|-------------------------------|--------------------------|
| Hepatic or renal disease (liver failure or cirrhosis or end-stage renal disease or Cr>221 µmol/L)             | 20<br>(1.9%)      | 10<br>(1.1%)            | 10 (5.3%)                | <0.01                    | 17 (1.6%)                      | 3 (6.3%)                      | 0.02                     |
| Alcohol abuse                                                                                                 | 104<br>(9.6%)     | 79<br>(8.9%)            | 25<br>(13.2%)            | 0.07                     | 95 (9.2%)                      | 9 (18.8%)                     | 0.03                     |
| Malignancy history                                                                                            | 163<br>(15.1%)    | 118<br>(13.2%)          | 45<br>(23.8%)            | <0.01                    | 150<br>(14.5%)                 | 13<br>(27.1%)                 | 0.02                     |
| Age >75 yr                                                                                                    | 255<br>(23.6%)    | 186<br>(20.9%)          | 69<br>(36.5%)            | <0.01                    | 230<br>(22.3%)                 | 25<br>(52.1%)                 | <0.01                    |
| Reduced platelet count or function: includes aspirin use, thrombocytopenia or blood dyscrasia like hemophilia | 1072<br>(99.3%)   | 886<br>(99.4%)          | 186<br>(98.4%)           | 0.14                     | 1025<br>(99.3%)                | 47<br>(97.9%)                 | 0.27                     |
| Prior bleeding                                                                                                | 11 (1%)           | 6 (0.7%)                | 5 (2.6%)                 | 0.01                     | 8 (0.8%)                       | 3 (6.3%)                      | <0.01                    |
| High blood pressure (uncontrolled)                                                                            | 183<br>(16.9%)    | 149<br>(16.8%)          | 34<br>(18.0%)            | 0.68                     | 172<br>(16.7%)                 | 11<br>(22.9%)                 | 0.26                     |
| Anemia: Hb <12 g/dL in men, <11 g/dL in women                                                                 | 92<br>(8.5%)      | 61<br>(6.8%)            | 31<br>(16.4%)            | <0.01                    | 72 (6.9%)                      | 20<br>(41.7%)                 | <0.01                    |
| Genetic factors: CYP 2C9 SNP                                                                                  | 0 (0%)            | 0 (0%)                  | 0 (0%)                   | <i>n/a</i>               | 0 (0%)                         | 0 (0%)                        | <i>n/a</i>               |
| High fall risk                                                                                                | 65 (6%)           | 41<br>(4.6%)            | 24<br>(12.7%)            | <0.01                    | 54 (5.2%)                      | 11<br>(22.9%)                 | <0.01                    |
| Stroke history                                                                                                | 54 (5%)           | 45<br>(5.1%)            | 9 (4.8%)                 | 0.87                     | 52 (5.0%)                      | 2 (4.2%)                      | 0.79                     |

P value of <0.05 was considered statistically significant.

Abbreviations: Cr =creatinine; CYP = cytochrome P; SNP = single nucleotide polymorphism

**Supplemental Table III:** Incidence of criteria included in the PARIS score.

| <b>PARIS</b>                                           | <b>Patients<br/>N (%)</b> | <b>No<br/>bleeding<br/>N=891</b> | <b>Any<br/>bleeding<br/>N=189</b> | <b><i>P</i><br/>value</b> | <b>No major<br/>bleeding<br/>N=1032</b> | <b>Bleeding<br/>BARC 3-5<br/>N=48</b> | <b><i>P</i><br/>value</b> |
|--------------------------------------------------------|---------------------------|----------------------------------|-----------------------------------|---------------------------|-----------------------------------------|---------------------------------------|---------------------------|
| Age (yr)                                               |                           |                                  |                                   | <0.01                     |                                         |                                       | <0.01                     |
| <50 – 0 pt                                             | 93 (8.6%)                 | 82 (9.2%)                        | 11 (5.8%)                         |                           | 93 (9.0%)                               | 0 (0%)                                |                           |
| 50-59 – 1 pt                                           | 209<br>(19.4%)            | 186<br>(20.9%)                   | 23 (12.2%)                        |                           | 206 (20.0%)                             | 3 (6.3%)                              |                           |
| 60-69 – 2 pts                                          | 310<br>(28.7%)            | 262<br>(29.4%)                   | 48 (25.4%)                        |                           | 303 (29.3%)                             | 7 (14.6%)                             |                           |
| 70-79 – 3 pts                                          | 320<br>(29.6%)            | 250<br>(28.1%)                   | 70 (37.0%)                        |                           | 298 (28.9%)                             | 22 (45.9%)                            |                           |
| >79 – 4 pts                                            | 148<br>(13.7%)            | 111<br>(12.5%)                   | 37 (19.6%)                        |                           | 132 (12.8%)                             | 16 (33.4%)                            |                           |
| BMI <25 or<br>>34.9 kg/m <sup>2</sup>                  | 405<br>(37.5%)            | 324<br>(36.4%)                   | 81 (42.9%)                        | 0.09                      | 388 (37.6%)                             | 17 (35.4%)                            | 0.76                      |
| Current<br>smoking                                     | 305<br>(28.2%)            | 265<br>(29.7%)                   | 40 (21.2%)                        | 0.02                      | 297 (28.8%)                             | 8 (16.7%)                             | 0.07                      |
| Anemia: Hb<br><12 g/dL in<br>men, <11 g/dL<br>in women | 92 (8.5%)                 | 61 (6.8%)                        | 31 (16.4%)                        | <0.01                     | 72 (7.0%)                               | 20 (41.7%)                            | <0.01                     |
| CrCl <60<br>ml/min                                     | 238<br>(22%)              | 167<br>(18.7%)                   | 71 (37.0%)                        | <0.01                     | 215 (20.8%)                             | 23 (47.9%)                            | <0.01                     |
| Triple therapy                                         | 123<br>(11.4%)            | 97 (10.9%)                       | 26 (13.8%)                        | 0.26                      | 113 (10.9%)                             | 10 (20.8%)                            | 0.04                      |

P value of <0.05 was considered statistically significant.

Abbreviations: BMI = body mass index; CrCl = creatinine clearance

### Any Bleeding Event-free Survival

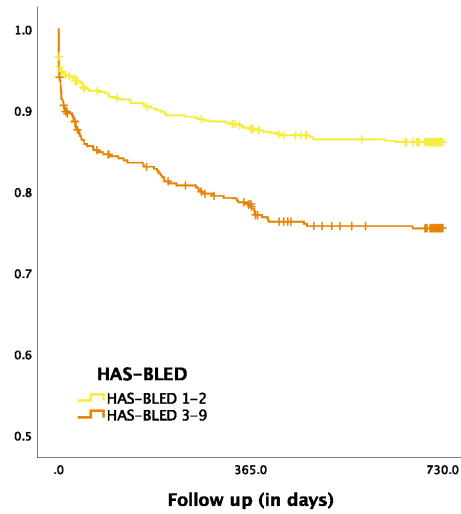

| Number at risk |     |     |     |
|----------------|-----|-----|-----|
| HAS-BLED 1-2   | 675 | 573 | 471 |
| HAS-BLED 3-9   | 405 | 300 | 248 |

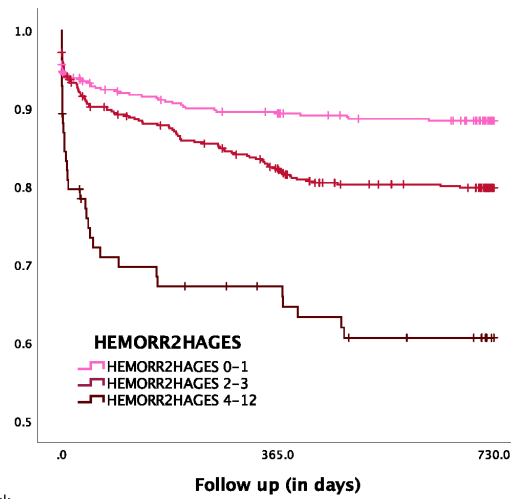

| Number at risk    |     |     |     |
|-------------------|-----|-----|-----|
| HEMORR2HAGES 0-1  | 475 | 409 | 338 |
| HEMORR2HAGES 2-3  | 521 | 413 | 343 |
| HEMORR2HAGES 4-12 | 84  | 51  | 38  |

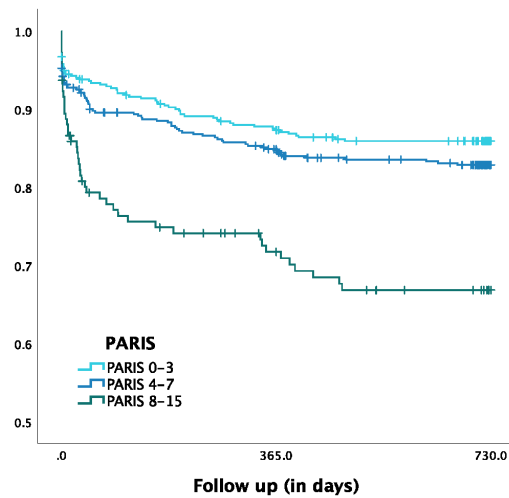

| Number at risk |     |     |     |
|----------------|-----|-----|-----|
| PARIS 0-3      | 454 | 389 | 329 |
| PARIS 4-7      | 483 | 394 | 317 |
| PARIS 8-15     | 143 | 90  | 73  |

**Supplemental Figure 1:** Kaplan-Meier Estimates of Any Bleeding-Free Survival at 2-year Follow-up, for A) HAS-BLED, B) HEMORR2HAGES, and C) PARIS scores.

## Area under the ROC Curve For Any Bleeding

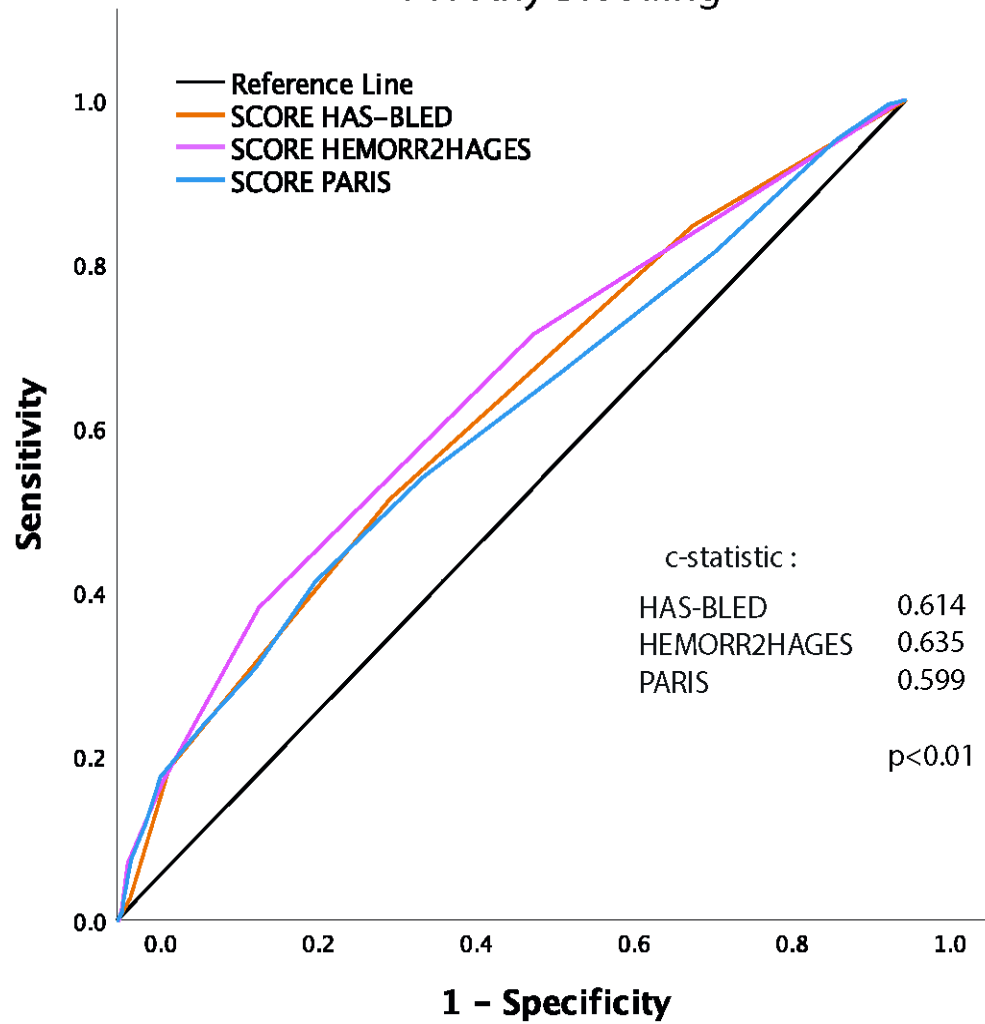

**Supplemental Figure 2:** Area under the receiver operating characteristic (ROC) curve for Any Bleeding.
